# Supplementary figures and images for: Chitooligosaccharides Modulate Glucose-Lipid Metabolism by Suppressing SMYD3 Pathways and Regulating Gut Microflora
Source: MDPI journal article supplement (doi:10.3390/md18010069), 2020-01-20

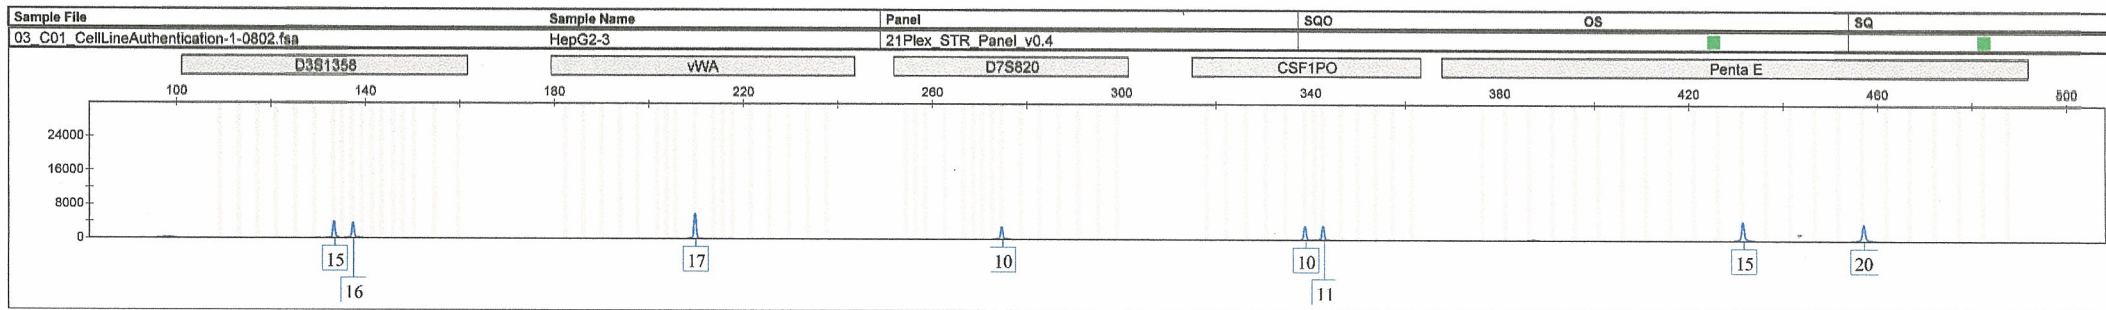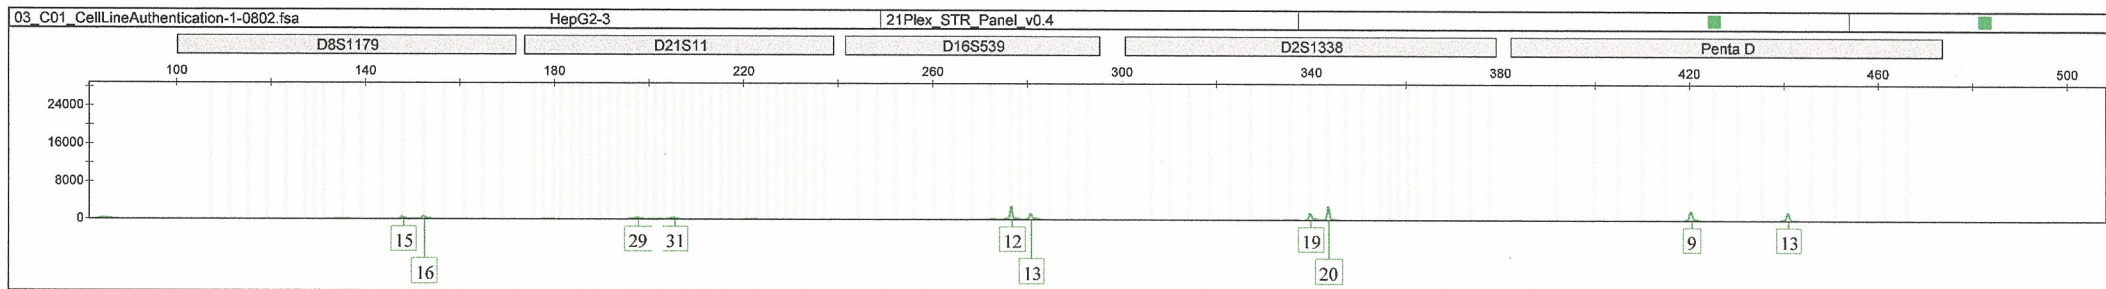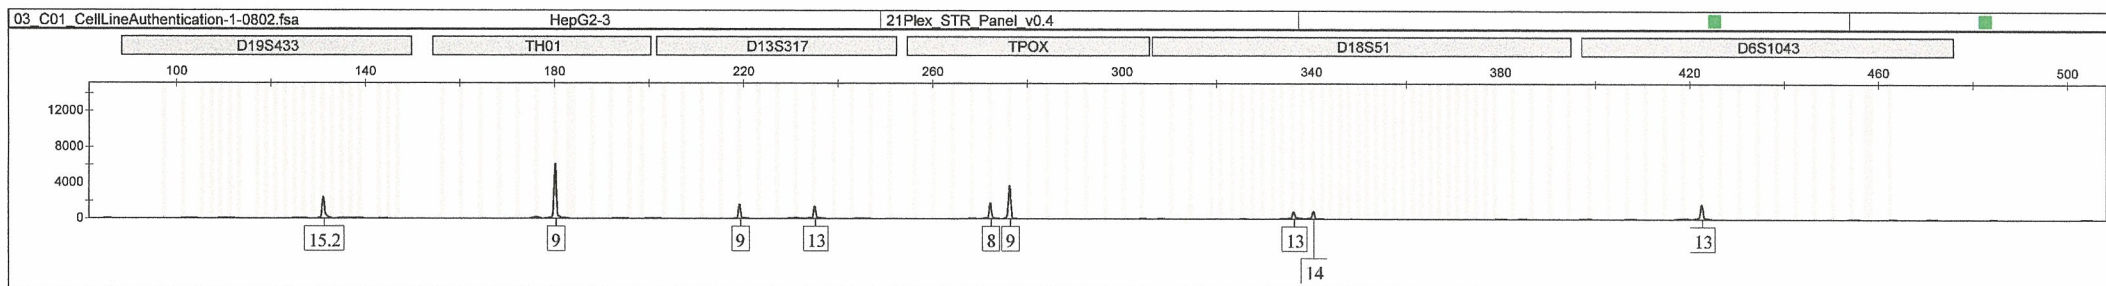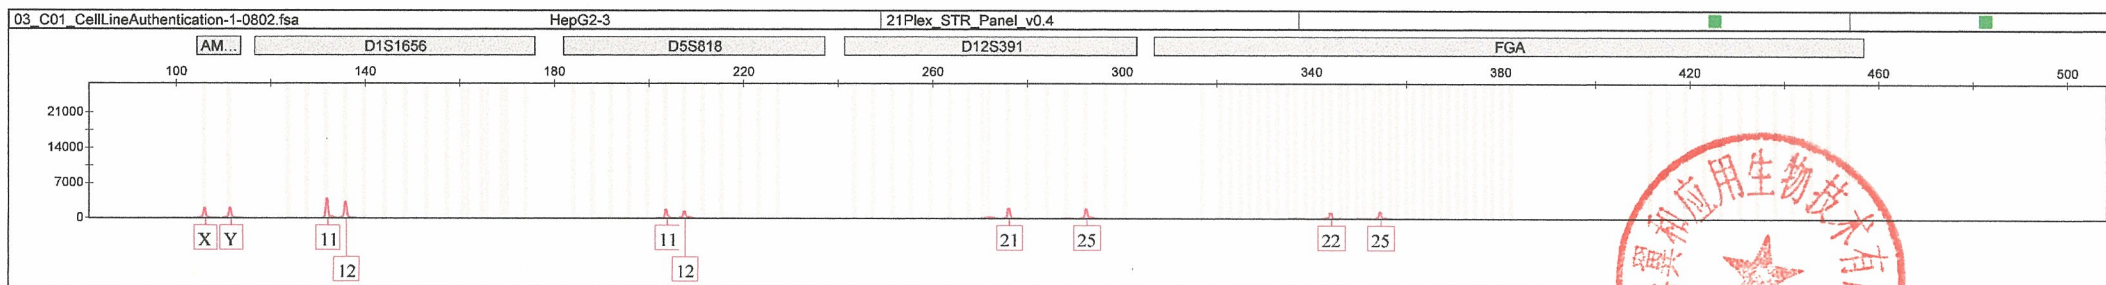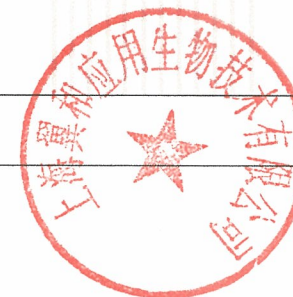

Supplement: s1 [file s1]
